# Supplementary material
Source: publisher figshare collection journal article supplement (https://karger.figshare.com/articles/dataset/_/5873166)
Supplement: Supplementary file 1 [file 1 › CRO486825_sm1.docx]

Supplemental Table 1. Histopathological evaluation of preoperative therapeutic effects

Grade 0 (no effect)

No therapeutic effect on carcinoma cells.

Grade 1 (little effect)

1a) Slight effect. Regardless of the area of involvement, a slight change in carcinoma cells can be seen. Or, in less than 1/3 of the area, strong changes can be seen in those cells.

1b) Medium effect. In more than 1/3 but less than 2/3 of the area, strong changes can be seen in carcinoma cells.

Grade 2 (fair effect)

2a) Strong effect. In more than 2/3 of the area of involvement, strong changes can be seen in carcinoma cells. However, there is no obvious carcinoma nest.

2b) Extremely strong effect. A nearly complete effect (Grade 3), though the number of carcinoma cells is few.

Grade 3 (complete effect)

Absence of residual carcinoma cells with necrosis or granulomatous tissue and/or fibrosis.
